# Supplementary material
Source: PubMed Central journal article supplement (PMC5291818)
Supplement: NIHMS838518-supplement-1.pdf [file NIHMS838518-supplement-1.pdf]

## Supplemental Figures

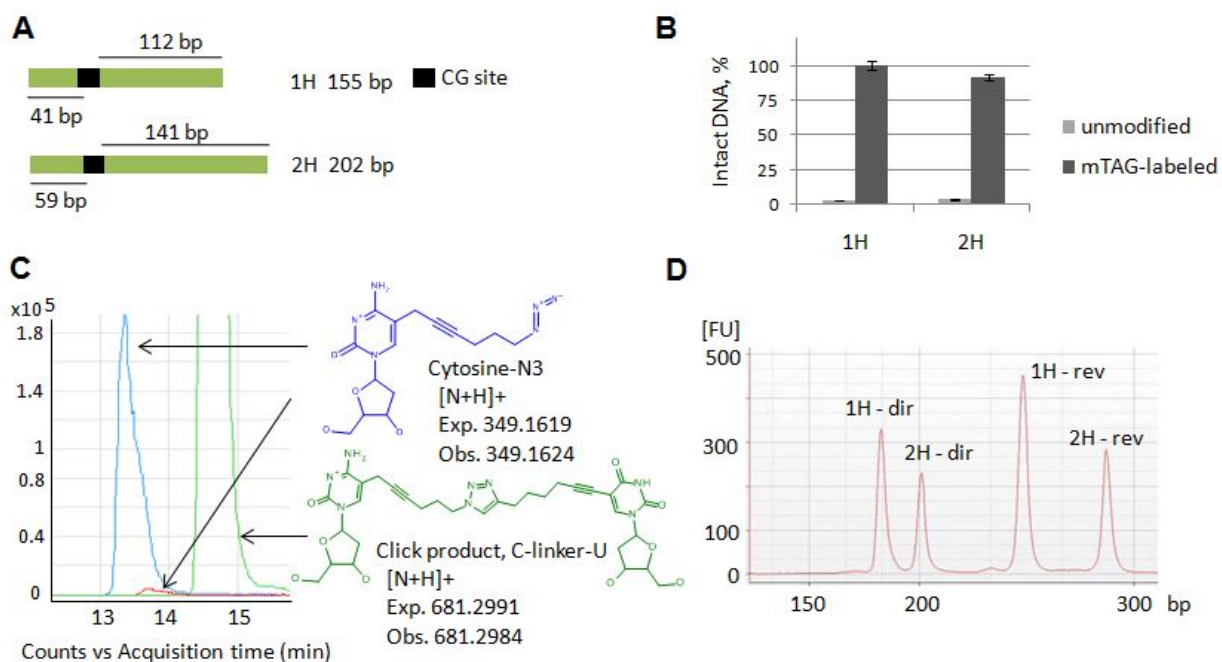

**Figure S1. Step-wise assessment of the TOP-seq procedure in a model system, related to Figure 1.** **A**, Schematic representation of model DNA fragments (1H, 155 bp and 2H, 202 bp) which lead to four asymmetric DNA amplicons (shown as black lines) after CG-specific tagging and TOP amplification. **B**, qPCR analysis of the eM.SssI-directed modification of uCG sites in model DNA. A nearly complete alkylation of uCG sites was observed judging from the fraction of DNA that is protected from cleavage by R.Hin6I restriction endonuclease. **C**, Chemical tethering of a priming oligonucleotide to azide-tagged CG sites. Efficiency of the azide-alkyne cycloaddition reaction was determined by HPLC-MS analysis of reaction products. Mass chromatograms of nucleosides show efficient conversion of the azide-tagged cytosine (cytosine-N3, blue) into the Click product (C-linker-U conjugate, green). Only a trace amount of unconverted azide-modified C (red) is observed after the reaction. Theoretical (Exp.) and observed (Obs.) masses of respective protonated nucleoside (N) products are as indicated. **D**, Agilent Bioanalyzer profiles of TOP-seq priming products obtained from 1H and 2H model DNA fragments. Since either cytosine of the double-stranded CG site can be tagged by M.SssI in the mTAG reaction (Fig. S1A), the primed DNA synthesis results in two DNA products comprising the upper and bottom DNA strands of template DNA. Theoretical (and experimentally derived) sizes of the TOP amplicons (including 135 bp adapters) are as follows: 1H-dir 176 (183) bp, 2H-dir 194 (202) bp, 1H-rev 247 (248) bp, 2H-rev 276 (284) bp.

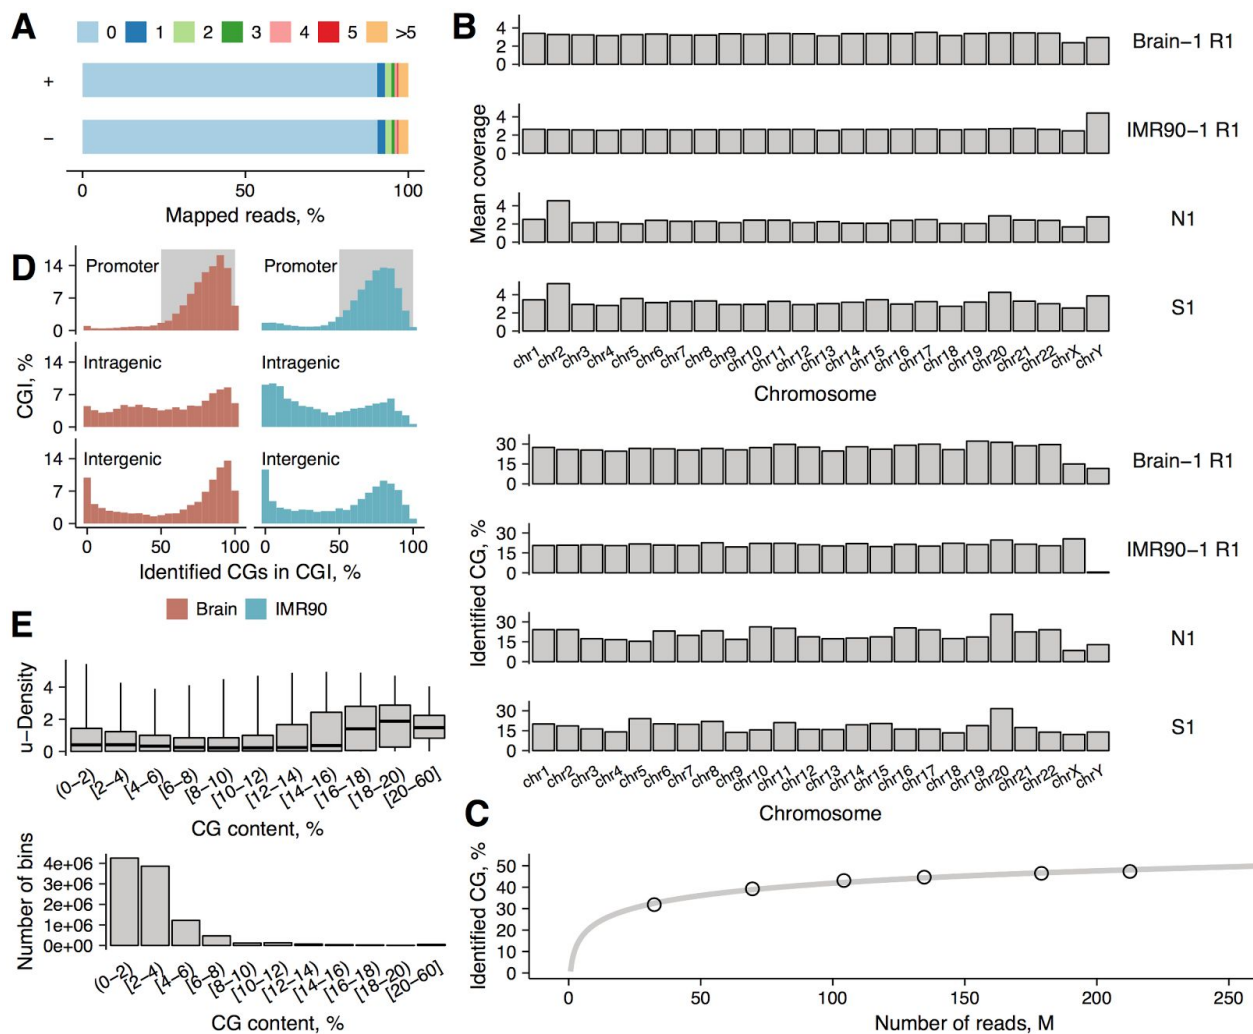

**Figure S2. TOP-seq analysis of the human genome, related to Figure 3.** **A**, Distribution of read distances to the nearest CG site in the Brain-1 R1 library. Reads from the upper and lower DNA strands are shown as “+” and “-”, respectively. **B**, Mean sequencing coverage of identified uCGs and the amount of identified uCGs per chromosome (for the Brain-1 R1, IMR90-1 R1, N1 and S1 libraries). **C**, The relationship of the fraction of identified CG sites on the number of useful TOP-seq reads using six IMR90 PI chips. Altogether, six PI chips result in ~220 M of reads and cover ~47% of all CG sites in the human genome (16x coverage of identified uCGs). The grey line shows a logarithmic fit extrapolating the growth of identified uCGs. “Low coverage” TOP-seq library with 30 million useful (86 million raw reads, derived from one PI chip) identifies 33.5% of CGs (the most unmethylated fraction of the human genome) with 4.1x mean coverage. **D**, Histograms showing the percentage of promoter, intragenic and intergenic CG islands stratified according to percentage of TOP-seq identified CGs in the CGIs. TOP-seq identifies 50-100% CGs in 93-96% of promoter CGIs (grey box area) indicating their highly unmethylated state. **E**, (Top) Distribution of u-density stratified according to CG content. TOP-seq u-density bandwidth 180 bp, CG density bandwidth 80 bp were used; (Bottom) Number of bins with different CG content.

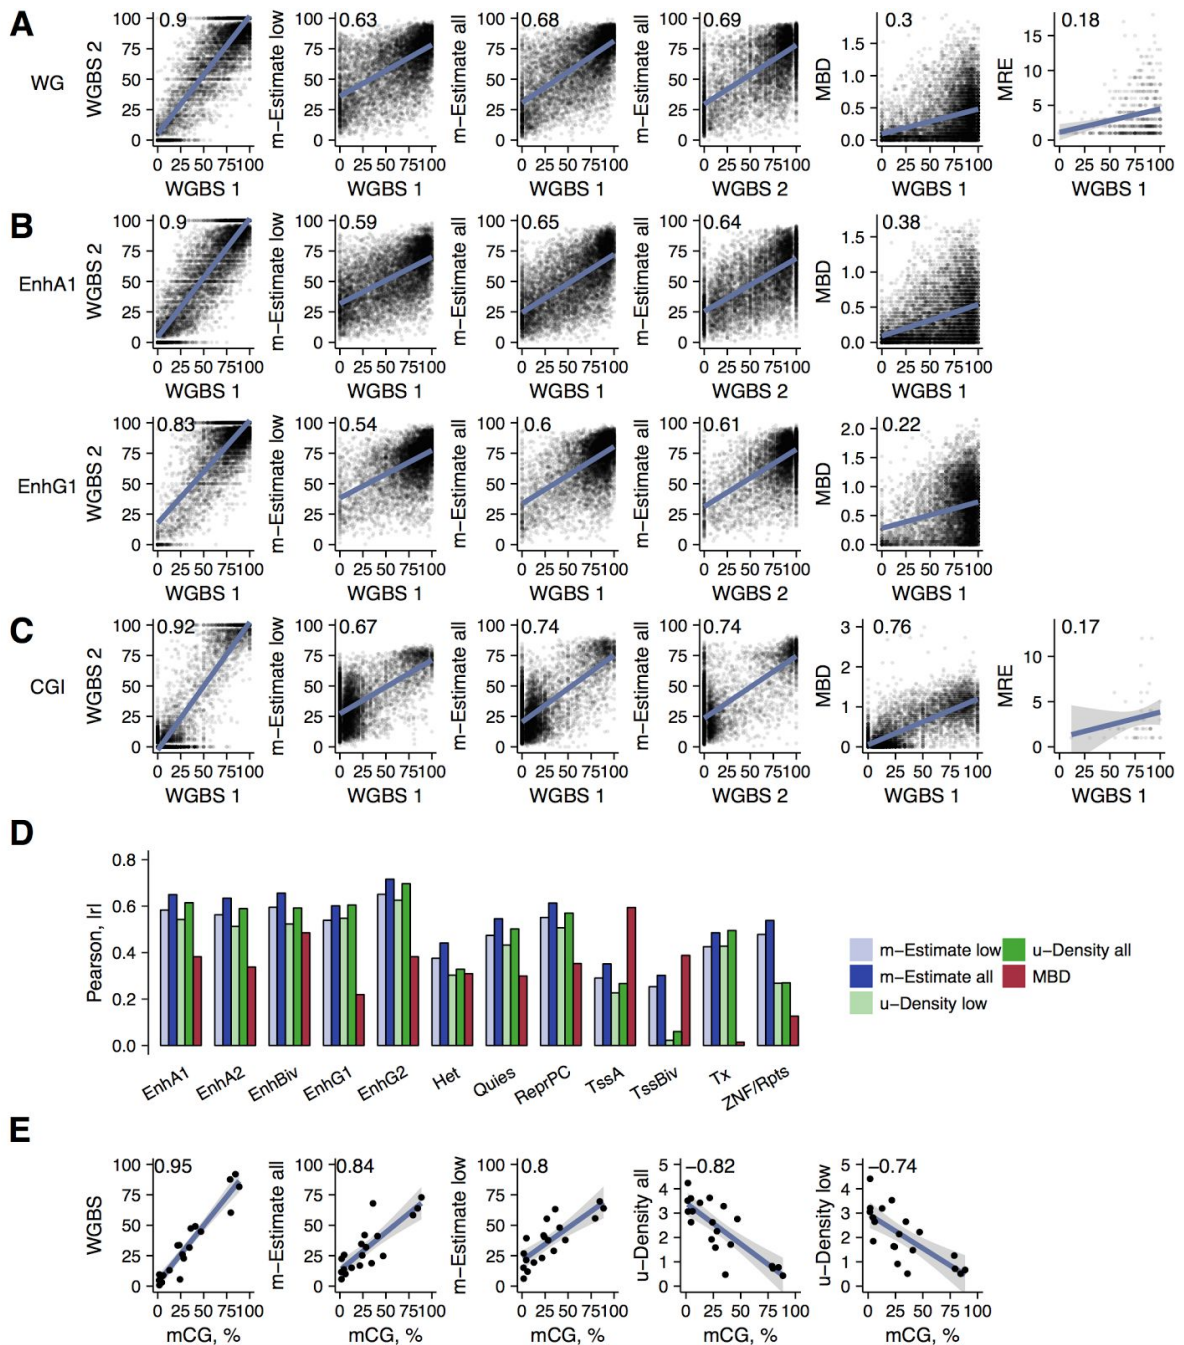

**Figure S3. Technology comparison for IMR90 methylome profiling at single CG resolution, related to Figure 3.**

**A**, Scatterplots illustrating the correlation between whole-genome datasets obtained using respective methylome profiling methods: WGBS 1 (Lister et al., 2009); WGBS 2 (Ziller et al., 2013); TOP-seq m-estimates of low (IMR90-1 R2) or high coverage TOP-seq ('all' means the combined IMR90 dataset, Table S1); MBD-seq (data from Bert et al., (2013); each CG in an analysis window received the same methylation score); MRE-seq. Pearson  $r$  values are shown above the graphs. **B**, Scatterplots demonstrating correlation between the methylome profiling methods across active enhancers A1 and genic enhancers G1 of IMR90 (chromatin data from Kundaje et al., 2015). Comparison of MRE-seq with WGBS is not shown due to insufficient data for analysis. **C**, Correlation scatterplots across CG islands. **D**, Correlation between TOP-seq data (u-density and m-estimates), MBD-seq and WGBS across various chromatin states. **E**, Comparison of TOP-seq with pyrosequencing in 20 selected regions in CGIs and putative enhancers of IMR90. Distribution of IMR90 WGBS 1 and TOP-seq signals ('low' data of IMR90-1 R2 and 'all' data of the combined IMR90 dataset) compared to pyrosequencing CG methylation values. Average methylation values of the respective method across the regions were used for comparison.

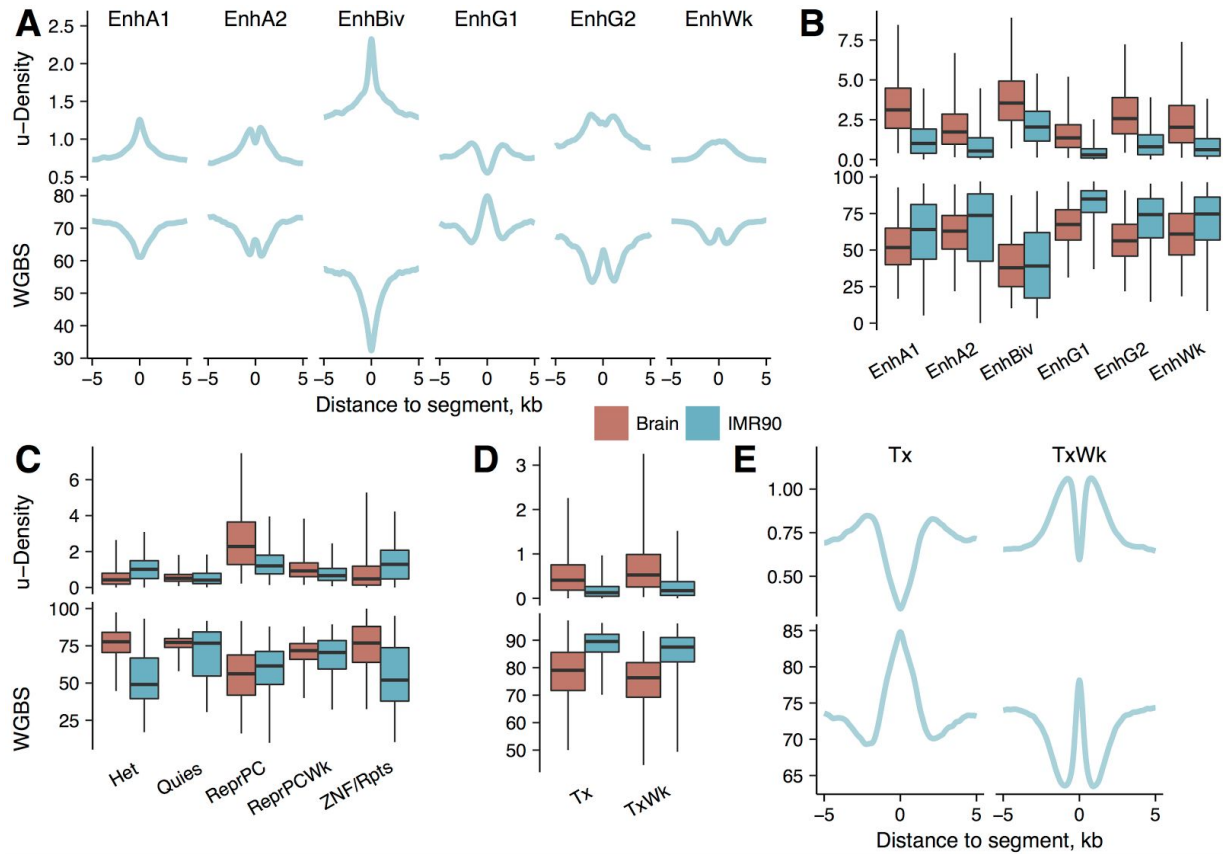

**Figure S4. DNA methylation and TOP-seq u-density profiles at various chromatin states, related to Figure 4. A,** Smoothed profiles of TOP-seq u-density and WGBS (IMR90; Lister et al., 2009) 5 kb upstream and downstream around enhancer segments. Enhancer states were defined as specific chromatin states (Kundaje et al., (2015)) comprising: two groups of active enhancers (containing strong H3K27ac signal - EnhA1/EnhA2); two groups of genic enhancers (EnhG1/EnhG2); bivalent enhancers (EnhBiv) and weak enhancers (EnhWk). Previous reports (Kundaje et al, 2015) and our studies found decreased DNA methylation in bivalent and active enhancers, while genic enhancer elements showed intermediate methylation levels. **B,** Mean TOP-seq u-density and WGBS (Lister et al., 2009; Wen et al., 2014) for different enhancer related chromatin states. **C,** Mean TOP-seq u-density and WGBS in various repressed chromatin segments: heterochromatin (Het); quiescent state (Ques); repressed polycomb (ReprPC); repressed polycomb weak (ReprPCWk) and ZNF repressed state (ZNF/Rpts). Increased methylation was detected in two inactive states, Het and Ques, consistent with previously reported overall hypermethylation of these segments in human tissues and their relative hypomethylation in IMR90 DNA. **D,** Mean TOP-seq u-density and WGBS in two actively transcribed states, strong (Tx) and weak transcription (TxWk) **E,** Profiles of TOP-seq u-density and WGBS (IMR90) 5 kb upstream and downstream of Tx and TxWk segments. Between the two actively transcribed states, the regions of higher expression (Tx) are more extensively methylated than those of lower expression (TxWk).



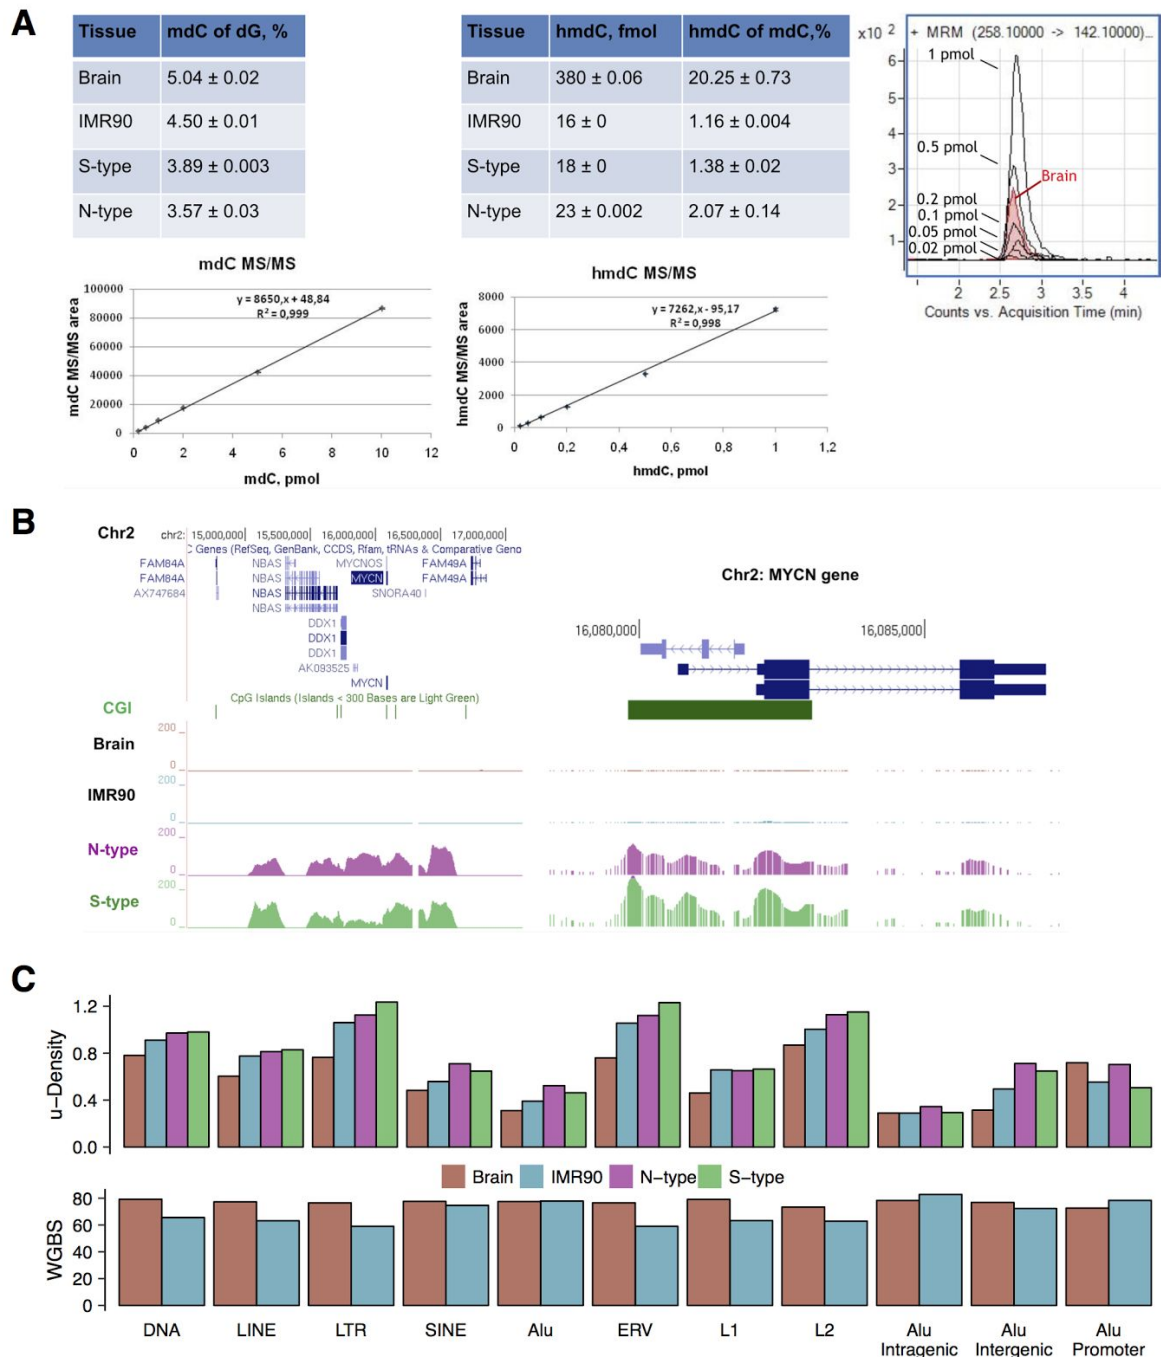

**Figure S5. TOP-seq analysis of the neuroblastoma N and S cell types, related to Figure 5. A, HPLC-MS/MS analysis of mdC (Left) and hmdC (Right) in genomic DNA of human tissues. Standard curves in the range of 0.2-10 pmol for mC and 0.02-1 pmol for hmC. MS/MS chromatograms of standard and endogenous 5hmC in the brain cortex sample are shown (Right). Data are represented as mean  $\pm$ SD. B, TOP-seq signal in chr2 shows high u-density around *MYCN* gene region in both N- and S-type cells (chr2:15,026,730-16,640,120; ~1.6 Mb region, covering *NBAS*, *DDX1* and *MYCN* genes). Close-up view of TOP-seq signal around *MYCN* gene is shown (Right). C, Distribution of mean TOP-seq u-density (top) and WGBS (bottom) for different repeat classes and families in the neuroblastoma cells, Brain and IMR90. (Left) SINE, LINE, LTR, DNA elements; (Middle) the most abundant families within each class (Alu for SINE, L1/L2 for LINE and ERV for LTR); (Right) promoter, intragenic and intergenic Alu repeats. Distribution analysis of Alu elements that contributed to repeat hypomethylation in the N-cells showed that all Alu elements displayed elevated TOP-seq u-density relative to the other investigated tissues, though the intergenic Alu elements showed the highest hypomethylation among the three Alu groups.**

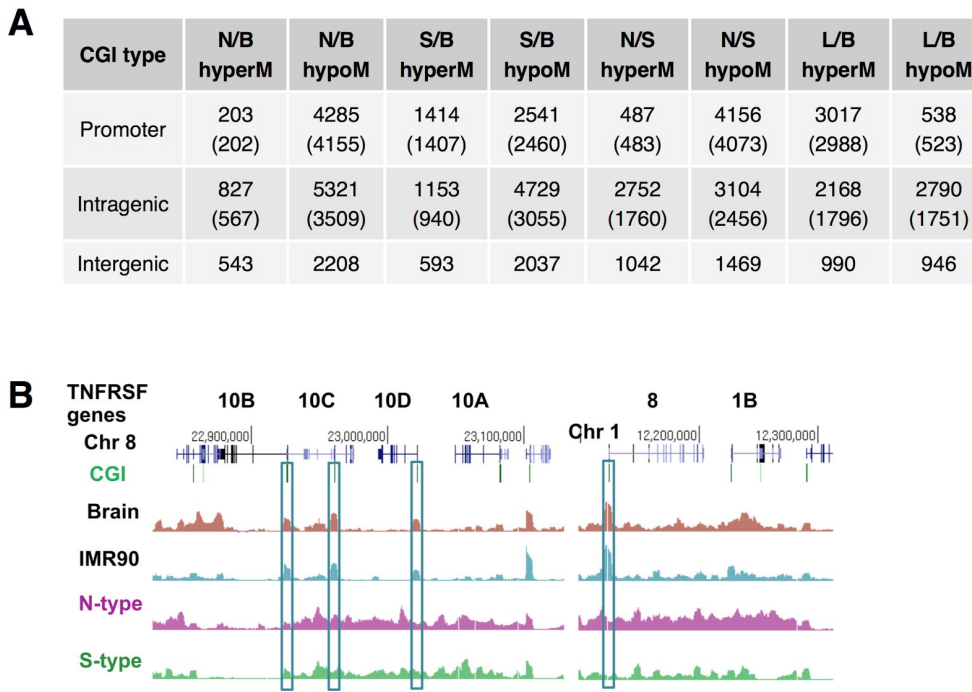

**Figure S6. TOP-seq analysis of differential CGI methylation in human tissues, related to Figure 5.** **A.** In pairwise comparisons between cancerous and normal tissues, four types of DMRs were analyzed: N/B- or S/B-specific hypomethylated regions (hypoM, regions that show higher Top-seq u-density in N or S cells than in Brain) and N/B- or S/B-specific hypermethylated regions (hyperM, higher u-density in Brain relative to N or S). Additionally, hypoM regions between the N or S cells were identified. The table shows numbers of hypoM and hyperM CGI-DMRs for N-type, S-type and IMR90 cells (relative to Brain reference) and N/S-hypoM and S/N-hypoM CGI regions (N and S cells compared to each other). Number of genes with assigned tissue-specific CGI-DMRs is shown in parentheses. **B.** Browser view of TOP-seq u-density profiles along two clusters of the tumor necrosis factor (TNF) receptor coding genes. The TNF family proteins are capable of inducing apoptosis, and their expression is largely disturbed in most cancer lines, including NB (Grau et al., 2010). The ~200 kb region in Chr8 covering *TNFRSF10A*, *TNFRSF10B*, *TNFRSF10C* and *TNFRSF10D* genes and the ~86 kb region in Chr1 coding for *TNFRSF8*, *TNFRSF1B* receptors are shown. Identified hyperM promoter and intragenic CGIs (relative to Brain and IMR90) are boxed. Strikingly, TOP-seq analysis found strong hypomethylation across the whole TNF-receptor clusters, which was particularly prominent in the N-type cells. This tempts us to speculate that besides the detected CGI methylation across the TNFR-genes, they are subject to an additional layer of regulation, presumably through involvement of the N-specific large hypomethylated domains (Berman et al., 2012)

## Supplemental Tables

**Table S1. TOP-seq sequencing of the human tissues, related to Figure 3.**

**Table S2. Regions for pyrosequencing, related to Figure 3.**

**Table S3. Differential methylation in CGIs, related to Figure 5.**

**Table S4. Validation of TOP-seq DMRs by pyrosequencing, related to Figure 5.**

**Table S5. Functional annotation analysis, related to Figure 5.**

**Table S6. Differential methylation in CGIs overlapping NB prognostic markers, related to Figure 5.**

**Table S1. TOP-seq sequencing of the human tissues, related to Figure 3.** Mapped reads: number of reads aligned to the reference genome and filtered for mapping quality. Unique per CG: number of reads remaining after removal of PCR duplicates and filtered for distance  $\leq 3$ bp. Called uCGs: number and percentage of identified uCGs from a total of 28 M CGs in human genome. Coverage: averaged TOP-seq read coverage for identified uCGs (first averaged between the chromosomes).

<sup>a</sup> - combined data of 2.5 PI chips.

| Chip ID   | Chip No | Sample                       | Raw Reads, M | Mapped Reads, M | Unique per CG | Called uCG, M | Called uCG (%) | Coverage |
|-----------|---------|------------------------------|--------------|-----------------|---------------|---------------|----------------|----------|
| 11        | 1       | Brain-1 R1 (low1)            | 55.60        | 31.00           | 24.70         | 7.49          | 26.60          | 3.27     |
| 11        | 1       | Brain-1 R2 (low2)            | 30.60        | 17.60           | 14.40         | 5.78          | 20.50          | 2.48     |
| 11        | 1       | Brain-1 R1/R2                | 86.20        |                 |               |               | 33.50          | 4.11     |
| 9         | 2       | Brain-2 R1 (low1)            | 49.60        | 28.80           | 19.50         | 5.71          | 20.20          | 3.37     |
| 9         | 2       | Brain-2 R2 (low2)            | 45.40        | 26.60           | 17.60         | 5.53          | 19.60          | 3.15     |
| 9         | 2       | Brain-2 R1/R2                | 95.00        |                 |               |               | 29.10          | 4.46     |
| 16        | 3       | IMR90-1 R1 (low1)            | 37.10        | 18.40           | 15.50         | 5.98          | 21.20          | 2.68     |
| 16        | 3       | IMR90-1 R2 (low2)            | 44.10        | 22.60           | 18.60         | 6.27          | 22.20          | 3.05     |
| 16        | 3       | IMR90-1 R1/R2                | 81.20        |                 |               |               | 31.90          | 3.93     |
| 15        | 4       | IMR90-2 R1 (low1)            | 45.90        | 24.10           | 15.70         | 5.71          | 20.20          | 2.84     |
| 20-22-24  | #       | IMR90-3 <sup>a</sup> (high1) | 241.00       | 113.00          | 92.10         | 9.98          | 35.40          | 8.90     |
| 21-23-24  | #       | IMR90-4 <sup>a</sup> (high2) | 236.00       | 131.50          | 97.10         | 9.64          | 34.20          | 9.72     |
| 20-24     | #       | IMR90-3/4                    | 477.00       | 244.50          | 189.20        | 13.10         | 46.30          | 14.10    |
| 16, 20-24 | #       | IMR90-1/3/4 (all)            | 563.2        |                 |               |               | 47             | 16       |
| 17        | #       | S-R1                         | 46.70        | 23.60           | 17.30         | 5.13          | 18.20          | 3.26     |
| 18        | #       | S-R2                         | 40.70        | 21.10           | 15.50         | 4.93          | 17.50          | 3.05     |
| 19        | #       | S-R3                         | 40.50        | 22.10           | 15.70         | 5.06          | 17.90          | 3.01     |
| 17-18-19  |         | S-R1/2/3                     | 127.90       |                 |               |               | 31.80          | 5.53     |
| 17        | #       | N-R1                         | 35.90        | 18.60           | 14.70         | 5.86          | 20.80          | 2.37     |
| 18        | #       | N-R2                         | 36.70        | 19.00           | 15.30         | 6.18          | 21.90          | 2.34     |
| 19        | #       | N-R3                         | 42.10        | 23.10           | 17.90         | 6.67          | 23.70          | 2.56     |
| 17-18-19  |         | N-R1/2/3                     | 114.70       |                 |               |               | 38.70          | 4.28     |

**Table S4. Validation of TOP-seq DMRs by pyrosequencing, related to Figure 5. logFC - log fold change. Pyro - pyrosequencing. adjPV - adjusted P value.**

| Region ID | Prognostic NB marker genes | DMRs for S/IMR90        |                         |                      | adjPV (S/IMR90) | DMRs for N/IMR90        |                         |                      | adjPV (N/IMR90) |
|-----------|----------------------------|-------------------------|-------------------------|----------------------|-----------------|-------------------------|-------------------------|----------------------|-----------------|
|           |                            | TOP-seq logFC (S/IMR90) | TOP-seq logFC (S/IMR90) | Pyro logFC (S/IMR90) |                 | TOP-seq logFC (N/IMR90) | TOP-seq logFC (N/IMR90) | Pyro logFC (N/IMR90) |                 |
| CGI-10    |                            | 0.28                    | 0.3                     | -1.1                 | 0.0001572       | -1.6                    | -1.5                    | 0.4                  | 0.0001572       |
| CGI-12    |                            | -4.59                   | -4.7                    | 1.2                  | 0.0053838       | -2.12                   | -2.3                    | 1.1                  | 0.0053838       |
| CGI-14    |                            | -2.07                   | -2.2                    | 0.9                  | 0.0000118       | -0.55                   | -0.5                    | -2.6                 | 0.0000118       |
| CGI-20    |                            | -0.61                   | -0.6                    | 0.7                  | 0.0016830       | -1.94                   | -2.1                    | 1                    | 0.0016830       |
| CGI-24    |                            | 1.06                    | 1.1                     | -0.5                 | 0.0005622       | 0.85                    | 0.9                     | -2.5                 | 0.0005622       |
| CGI-31    |                            | 0.29                    | 0.3                     | -0.1                 | 0.0005622       | 1.51                    | 1.5                     | -0.7                 | 0.0005622       |
| CGI-32    | TNFRSF8                    | -2.8                    | -2.7                    | 2.7                  | 0.0000021       | -1.38                   | -1.6                    | 2.5                  | 0.0000021       |
| CGI-33    | RASSF1                     | -4.49                   | -3.3                    | 2                    | 0.0015126       | -4.29                   | -3.2                    | 1.9                  | 0.0015126       |
| CGI-34    | ZMYND10                    | -3.09                   | -3.2                    | 3.9                  | 0.0000021       | -3.1                    | -3                      | 3.8                  | 0.0000021       |
| CGI-6     |                            | -0.65                   | -0.7                    | 0.5                  | 0.0006452       | -0.92                   | -1                      | -0.1                 | 0.0006452       |

Regions that failed in pyrosequencing validation are highlighted.



**Table S6. Differential methylation in CGIs overlapping NB prognostic markers, related to Figure 5.** Log fold change in TOP-seq u-density is shown for N/S, N/B, S/B and IMR90/B pairs. Positive fold change in TOP-seq u-density signal means lower methylation in the first member of the respective pair and *vice versa*.

| gene     | CGI type   | chr   | start     | end       | N/S    | N/B    | S/B    | IMR90/B |
|----------|------------|-------|-----------|-----------|--------|--------|--------|---------|
| ACSS3    | promoter   | chr12 | 81330608  | 81331514  | 0      | 0      | 0      | 0       |
| CCND1    | promoter   | chr11 | 69451136  | 69458596  | -0.27  | -0.96  | -0.69  | 0       |
| CCND2    | promoter   | chr12 | 4378366   | 4382222   | -0.29  | -0.65  | -0.36  | -0.21   |
| GNAS     | promoter   | chr20 | 57414595  | 57414896  | 0      | 0      | 0      | 0       |
| HIST1H3C | promoter   | chr6  | 26044203  | 26044469  | 0.79   | -3.67  | -4.46  | 0       |
| HOXD3    | promoter   | chr2  | 177001221 | 177001783 | -0.5   | -1.29  | -0.78  | 0       |
| JAK2     | promoter   | chr9  | 4984543   | 4985630   | 0      | 0      | 0      | 0       |
| KRT19    | promoter   | chr17 | 39683908  | 39684599  | 0.74   | -3.96  | -4.7   | 0.49    |
| PCDHB16  | promoter   | chr5  | 140558931 | 140559789 | 0      | -2.02  | -2.15  | -0.95   |
| POU2F2   | promoter   | chr19 | 42700686  | 42700975  | 0      | 0      | 0      | 0       |
| RASSF1   | promoter   | chr3  | 50377803  | 50378540  | 0.2    | -4.11  | -4.3   | 0.18    |
| RB1      | promoter   | chr13 | 48877459  | 48878501  | 0      | -0.66  | -0.58  | 0       |
| ACSS3    | intragenic | chr12 | 81471569  | 81472119  | 0.34   | -3.44  | -3.78  | 0       |
| CCND1    | intragenic | chr11 | 69461060  | 69461378  | 1.62   | -2.15  | -3.77  | -1.05   |
| CCND1    | intragenic | chr11 | 69468810  | 69469152  | -0.57  | -2.09  | -1.52  | -1.42   |
| CCND2    | intragenic | chr12 | 4383193   | 4384405   | 0      | -0.74  | -0.62  | 0       |
| FGF6     | intragenic | chr12 | 4554405   | 4554624   | 0      | 1.37   | 1.34   | 0       |
| GNAS     | intragenic | chr20 | 57415135  | 57417153  | -0.37  | -0.98  | -0.6   | 0.19    |
| GNAS     | intragenic | chr20 | 57426729  | 57427047  | -0.26  | -2.06  | -1.8   | -0.44   |
| GNAS     | intragenic | chr20 | 57427691  | 57427995  | 0      | 0      | 0      | 0       |
| GNAS     | intragenic | chr20 | 57428308  | 57428516  | 0      | 0      | 0      | 0       |
| GNAS     | intragenic | chr20 | 57429024  | 57431239  | -0.44  | -0.43  | 0      | 0       |
| GNAS     | intragenic | chr20 | 57463652  | 57467739  | 0      | 0      | 0      | 0       |
| HOXD3    | intragenic | chr2  | 177004452 | 177004693 | 2.65   | -1.92  | -4.57  | -0.2    |
| HOXD3    | intragenic | chr2  | 177005364 | 177005666 | -0.54  | -2.27  | -1.73  | -0.21   |
| HOXD3    | intragenic | chr2  | 177012371 | 177012675 | 15.7   | -4.5   | -20.2  | -0.19   |
| HOXD3    | intragenic | chr2  | 177016416 | 177016632 | 2.24   | -4.83  | -7.07  | -0.46   |
| HOXD3    | intragenic | chr2  | 177017266 | 177017489 | 36.34  | -4.19  | -40.53 | -0.34   |
| HOXD3    | intragenic | chr2  | 177024501 | 177025692 | 1.19   | -5.15  | -6.34  | -0.22   |
| HOXD3    | intragenic | chr2  | 177027617 | 177028014 | 35.59  | -5.17  | -40.76 | 0       |
| HOXD3    | intragenic | chr2  | 177029413 | 177029941 | 0      | -5.31  | -5.29  | -0.28   |
| HOXD3    | intragenic | chr2  | 177036254 | 177037213 | 0      | -6.61  | -6.6   | 0       |
| JAK2     | intragenic | chr9  | 5040734   | 5041922   | 0      | 0      | 0      | 0       |
| JAK2     | intragenic | chr9  | 5042797   | 5043270   | -2.07  | -3.87  | -1.8   | -0.46   |
| JAK2     | intragenic | chr9  | 5110784   | 5112274   | 0      | 0      | 0      | 0       |
| PCDHB10  | intragenic | chr5  | 140573423 | 140574316 | 1.68   | -1.15  | -2.83  | 0       |
| PCDHB11  | intragenic | chr5  | 140580723 | 140581625 | 0.63   | -1.48  | -2.11  | -0.36   |
| PCDHB12  | intragenic | chr5  | 140589744 | 140590657 | 1.03   | -1.3   | -2.33  | -0.41   |
| PCDHB13  | intragenic | chr5  | 140595008 | 140595880 | 0.61   | -1.95  | -2.56  | -0.47   |
| PCDHB14  | intragenic | chr5  | 140604453 | 140605304 | 0.66   | -2.19  | -2.85  | 0       |
| PCDHB15  | intragenic | chr5  | 140626444 | 140627373 | 1.36   | -1.87  | -3.23  | -0.35   |
| PCDHB16  | intragenic | chr5  | 140563510 | 140564361 | 0      | -1.47  | -1.54  | -0.6    |
| PCDHB17  | intragenic | chr5  | 140536896 | 140537766 | 0.4    | -1.1   | -1.5   | -0.93   |
| PCDHB2   | intragenic | chr5  | 140475599 | 140476607 | 0      | -2.3   | -2.22  | -0.4    |
| PCDHB3   | intragenic | chr5  | 140481546 | 140482460 | 0.28   | -2.59  | -2.87  | -0.63   |
| PCDHB4   | intragenic | chr5  | 140502890 | 140503804 | -35.23 | -39.23 | -4     | -0.68   |
| PCDHB5   | intragenic | chr5  | 140516311 | 140517300 | -1.51  | -4     | -2.49  | -0.59   |
| PCDHB6   | intragenic | chr5  | 140531157 | 140532017 | -0.35  | -1.99  | -1.65  | 0       |
| PCDHB7   | intragenic | chr5  | 140553681 | 140554637 | 0.61   | -1.88  | -2.49  | -0.99   |
| POU2F2   | intragenic | chr19 | 42599507  | 42600522  | -2.49  | -3.51  | -1.02  | -0.52   |
| POU2F2   | intragenic | chr19 | 42637277  | 42637684  | 0      | 0      | 0      | 0       |
| POU2F2   | intragenic | chr19 | 42681304  | 42681513  | 0      | 0      | 0      | 0       |
| RASSF1   | intragenic | chr3  | 50374264  | 50375629  | -0.33  | 0      | 0.24   | 0.42    |
| RB1      | intragenic | chr13 | 48890957  | 48891549  | 15.48  | -2.79  | -18.26 | -0.4    |
| RB1      | intragenic | chr13 | 48892635  | 48893857  | -0.2   | -4.76  | -4.56  | -0.91   |
| ZMYND10  | intragenic | chr3  | 50382889  | 50383310  | 0      | -3.19  | -3.19  | 0       |
